# Supplementary material for: Comparative Genomic Analysis of ST131 Subclade C2 of ESBL-Producing E. coli Isolates from Patients with Recurrent and Sporadic Urinary Tract Infections
Source: MDPI journal article supplement (doi:10.3390/microorganisms11071622), 2023-06-21

**Table S1.** Sequence Read Archive (SRA) accession numbers for Illumina and Nanopore Read datasets generated for each isolate.

| Isolate | Illumina reads accession number | Nanopore reads accession number |
|---------|---------------------------------|---------------------------------|
| R1      | SRR22404178                     | SRR22404173                     |
| R2      | SRR22405943                     | SRR22405913                     |
| R3      | SRR22405942                     | SRR22405912                     |
| R3B*    | SRR22485986                     | -                               |
| R4      | SRR22405917                     | SRR22405911                     |
| R5      | SRR22404177                     | SRR22404172                     |
| R6      | SRR22405906                     | SRR22405910                     |
| R6B*    | SRR22485985                     | -                               |
| R7      | SRR22405938                     | SRR22405909                     |
| R8      | SRR22405931                     | SRR22405908                     |
| R9      | SRR22405930                     | SRR22405907                     |
| R9B*    | SRR22485988                     | -                               |
| R10     | SRR22405929                     | SRR22405905                     |
| R11     | SRR22405928                     | SRR22405904                     |
| R11B    | SRR22485987                     | -                               |
| R12     | SRR22405926                     | SRR22405903                     |
| R12B*   | SRR22485983                     | -                               |
| R13     | SRR22405941                     | SRR22405902                     |
| R14     | SRR22405927                     | SRR22405901                     |
| R14B*   | SRR22485984                     | -                               |
| S1      | SRR22404176                     | SRR22404171                     |
| S2      | SRR22405925                     | SRR22405900                     |
| S3      | SRR22405924                     | SRR22405899                     |
| S4      | SRR22405923                     | SRR22405898                     |
| S5      | SRR22405922                     | SRR22405940                     |
| S6      | SRR22405921                     | SRR22405939                     |
| S7      | SRR22405920                     | SRR22405937                     |
| S8      | SRR22405919                     | SRR22405936                     |
| S9      | SRR22405918                     | SRR22405935                     |
| S10     | SRR22404175                     | SRR22404170                     |
| S11     | SRR22404174                     | SRR22404169                     |
| S12     | SRR22405916                     | SRR22405934                     |
| S13     | SRR22405915                     | SRR22405933                     |
| S14     | SRR22405914                     | SRR22405932                     |

\*Subsequence Isolate of the same patient.

**Table S2.** Basic characteristics of the genome sequences obtained for all recurrent isolates.

|                             | R1              | R2                | R3                | R4                | R5              | R6                | R7                | R8                | R9                | R10               | R11               | R12               | R13-              | R14               |
|-----------------------------|-----------------|-------------------|-------------------|-------------------|-----------------|-------------------|-------------------|-------------------|-------------------|-------------------|-------------------|-------------------|-------------------|-------------------|
| <b>Accession n</b>          | JAPKFR000000000 | CP107188-CP107191 | CP107184-CP107187 | CP107182-CP107183 | JAPKFQ000000000 | CP107178-CP107181 | CP107174-CP107177 | CP107172-CP107173 | CP107164-CP107171 | CP107162-CP107163 | CP107155-CP107161 | CP107153-CP107154 | CP107151-CP107152 | CP107147-CP107150 |
| <b># contigs</b>            | 63              | 4                 | 4                 | 2                 | 14              | 4                 | 4                 | 2                 | 8                 | 2                 | 7                 | 2                 | 2                 | 4                 |
| <b>Total length</b>         | 5,335,569       | 5,266,470         | 5,509,526         | 5,444,223         | 5,304,740       | 5,575,248         | 5,363,779         | 5,245,954         | 5,276,398         | 5,266,854         | 5,357,694         | 5,352,431         | 5,308,215         | 5,432,600         |
| <b>GC (%)</b>               | 50.71           | 50.8              | 50.67             | 50.75             | 50.79           | 50.72             | 50.6              | 50.78             | 50.67             | 50.79             | 50.74             | 50.71             | 50.8              | 50.72             |
| <b>N50</b>                  | 667,722         | 5,095,314         | 5,283,900         | 5,325,420         | 1,528,023       | 5,297,994         | 5,118,568         | 5,096,686         | 5,100,590         | 5,128,182         | 5,120,131         | 5,228,698         | 5,120,420         | 5,230,650         |
| <b>Total Genes</b>          | 5,281           | 5,171             | 5,495             | 5,431             | 5,256           | 5,561             | 5,283             | 5,168             | 5,170             | 5,205             | 5,288             | 5,305             | 5,252             | 5,396             |
| <b>CDS</b>                  | 5,177           | 5,058             | 5,386             | 5,318             | 5,145           | 5,448             | 5,166             | 5,051             | 5,055             | 5,092             | 5,175             | 5,192             | 5,139             | 5,283             |
| <b>RNA genes (clusters)</b> | ND              | 7                 | 7                 | 7                 | ND              | 7                 | 7                 | 7                 | 7                 | 7                 | 7                 | 7                 | 7                 | 7                 |
| <b>tRNAs</b>                | 82              | 86                | 82                | 86                | 84              | 86                | 90                | 90                | 88                | 86                | 86                | 86                | 86                | 86                |
| <b>Pseudogenes</b>          | 200             | 209               | 252               | 229               | 221             | 244               | 214               | 196               | 187               | 216               | 205               | 231               | 225               | 257               |

**Table S3.** Basic characteristics of the genome sequences obtained for all sporadic isolates.

|                             | S1              | S2                | S3              | S4                | S5                | S6                | S7                | S8                | S9                | S10             | S11             | S12               | S13               | S14               |
|-----------------------------|-----------------|-------------------|-----------------|-------------------|-------------------|-------------------|-------------------|-------------------|-------------------|-----------------|-----------------|-------------------|-------------------|-------------------|
| <b>Accession N</b>          | JAPKFP000000000 | CP107143-CP107146 | CP107142        | CP107140-CP107141 | CP107137-CP107139 | CP107134-CP107136 | CP107128-CP107133 | CP107126-CP107127 | CP107122-CP107125 | JAPKFO000000000 | JAPKFN000000000 | CP107120-CP107121 | CP107117-CP107119 | CP107114-CP107116 |
| <b># contigs</b>            | 7               | 4                 | 1<br>5127,1     | 2                 | 3                 | 3                 | 6                 | 2                 | 4                 | 3               | 9               | 2                 | 3                 | 3                 |
| <b>Total length</b>         | 5,454,249       | 5,363,685         | 86              | 5,363,539         | 5,506,813         | 5,564,723         | 5,388,022         | 5,382,852         | 5,248,437         | 5,415,538       | 5,261,769       | 5,431,930         | 5,402,261         | 5,439,943         |
| <b>GC (%)</b>               | 50.61           | 50.6              | 50.68<br>5,127, | 50.71             | 50.68             | 50.68             | 50.86             | 50.7              | 50.8              | 50.67           | 50.78           | 50.67             | 50.72             | 50.78             |
| <b>N50</b>                  | 4,054,986       | 5,118,474         | 186             | 5,226,065         | 5,258,595         | 5,332,681         | 5,247,286         | 5,241,944         | 5,071,232         | 5,260,846       | 5,060,226       | 5,281,079         | 5,287,038         | 5,259,570         |
| <b>Total Genes</b>          | 5,431           | 5,286             | 5,027           | 5,317             | 5,481             | 5,559             | 5,354             | 5,337             | 5,184             | 5,377           | 5,189           | 5,378             | 5,375             | 5,433             |
| <b>CDS</b>                  | 5,318           | 5,169             | 4,915           | 5,201             | 5,369             | 5,446             | 5,239             | 5,225             | 5,072             | 5,264           | 5,077           | 5,265             | 5,262             | 5,315             |
| <b>RNA genes (clusters)</b> | ND              | 7                 | 7               | 7                 | 7                 | 7                 | 7                 | 7                 | 7                 | ND              | ND              | 7                 | 7                 | 7                 |
| <b>tRNAs</b>                | 86              | 90                | 85              | 89                | 85                | 86                | 88                | 85                | 85                | 86              | 85              | 86                | 86                | 91                |
| <b>Pseudogenes</b>          | 233             | 213               | 195             | 229               | 247               | 253               | 232               | 234               | 219               | 241             | 199             | 241               | 231               | 221               |

**Table S4.** Number of SNPs identified between the pairs of isolates from the same patient with recurrent infection (Index and subsequent isolate).

| Patient | Ref. genome | Query genome | N° of variants detected |
|---------|-------------|--------------|-------------------------|
| P01     | R9          | R9B          | 5                       |
| P02     | R11         | R11B         | 18                      |
| P03     | R3          | R3B          | 3                       |
| P04     | R6          | R6B          | 10                      |
| P05     | R14         | R14B         | 2                       |
| P06     | R12         | R12B         | 6                       |

**Table S5.** Virulence factors/determinants found in common in all isolates.

[illegible]

**Continuation Table S5.** Virulence factors/determinants found in common in all isolates.

[illegible]

**Continuation Table S5.** Virulence factors/determinants found in common in all isolates.

[illegible]

**Table S6.** Antimicrobial resistance factors found in common in all isolates.

[illegible]

**Continuation Table S6.** Antimicrobial resistance factors found in common in all isolates.

| AB factor  | R1 | R2 | R3 | R4 | R5 | R6 | R7 | R8 | R9 | R10 | R11 | R12 | R13 | R14 | S1 | S2 | S3 | S4 | S5 | S6 | S7 | S8 | S9 | S10 | S11 | S12 | S13 | S14 |
|------------|----|----|----|----|----|----|----|----|----|-----|-----|-----|-----|-----|----|----|----|----|----|----|----|----|----|-----|-----|-----|-----|-----|
| gadW       | Y  | Y  | Y  | Y  | Y  | Y  | Y  | Y  | Y  | Y   | Y   | Y   | Y   | Y   | Y  | Y  | Y  | Y  | Y  | Y  | Y  | Y  | Y  | Y   | Y   | Y   | Y   |     |
| gadX       | Y  | Y  | Y  | Y  | Y  | Y  | Y  | Y  | Y  | Y   | Y   | Y   | Y   | Y   | Y  | Y  | Y  | Y  | Y  | Y  | Y  | Y  | Y  | Y   | Y   | Y   | Y   |     |
| kdpE       | Y  | Y  | Y  | Y  | Y  | Y  | Y  | Y  | Y  | Y   | Y   | Y   | Y   | Y   | Y  | Y  | Y  | Y  | Y  | Y  | Y  | Y  | Y  | Y   | Y   | Y   | Y   |     |
| marA       | Y  | Y  | Y  | Y  | Y  | Y  | Y  | Y  | Y  | Y   | Y   | Y   | Y   | Y   | Y  | Y  | Y  | Y  | Y  | Y  | Y  | Y  | Y  | Y   | Y   | Y   | Y   |     |
| mdtA       | Y  | Y  | Y  | Y  | Y  | Y  | Y  | Y  | Y  | Y   | Y   | Y   | Y   | Y   | Y  | Y  | Y  | Y  | Y  | Y  | Y  | Y  | Y  | Y   | Y   | Y   | Y   |     |
| mdtB       | Y  | Y  | Y  | Y  | Y  | Y  | Y  | Y  | Y  | Y   | Y   | Y   | Y   | Y   | Y  | Y  | Y  | Y  | Y  | Y  | Y  | Y  | Y  | Y   | Y   | Y   | Y   |     |
| mdtC       | Y  | Y  | Y  | Y  | Y  | Y  | Y  | Y  | Y  | Y   | Y   | Y   | Y   | Y   | Y  | Y  | Y  | Y  | Y  | Y  | Y  | Y  | Y  | Y   | Y   | Y   | Y   |     |
| mdtE       | Y  | Y  | Y  | Y  | Y  | Y  | Y  | Y  | Y  | Y   | Y   | Y   | Y   | Y   | Y  | Y  | Y  | Y  | Y  | Y  | Y  | Y  | Y  | Y   | Y   | Y   | Y   |     |
| mdtF       | Y  | Y  | Y  | Y  | Y  | Y  | Y  | Y  | Y  | Y   | Y   | Y   | Y   | Y   | Y  | Y  | Y  | Y  | Y  | Y  | Y  | Y  | Y  | Y   | Y   | Y   | Y   |     |
| mdtG       | Y  | Y  | Y  | Y  | Y  | Y  | Y  | Y  | Y  | Y   | Y   | Y   | Y   | Y   | Y  | Y  | Y  | Y  | Y  | Y  | Y  | Y  | Y  | Y   | Y   | Y   | Y   |     |
| mdtH       | Y  | Y  | Y  | Y  | Y  | Y  | Y  | Y  | Y  | Y   | Y   | Y   | Y   | Y   | Y  | Y  | Y  | Y  | Y  | Y  | Y  | Y  | Y  | Y   | Y   | Y   | Y   |     |
| mdtM       | Y  | Y  | Y  | Y  | Y  | Y  | Y  | Y  | Y  | Y   | Y   | Y   | Y   | Y   | Y  | Y  | Y  | Y  | Y  | Y  | Y  | Y  | Y  | Y   | Y   | Y   | Y   |     |
| mdtN       | Y  | Y  | Y  | Y  | Y  | Y  | Y  | Y  | Y  | Y   | Y   | Y   | Y   | Y   | Y  | Y  | Y  | Y  | Y  | Y  | Y  | Y  | Y  | Y   | Y   | Y   | Y   |     |
| mdtO       | Y  | Y  | Y  | Y  | Y  | Y  | Y  | Y  | Y  | Y   | Y   | Y   | Y   | Y   | Y  | Y  | Y  | Y  | Y  | Y  | Y  | Y  | Y  | Y   | Y   | Y   | Y   |     |
| mdtP       | Y  | Y  | Y  | Y  | Y  | Y  | Y  | Y  | Y  | Y   | Y   | Y   | Y   | Y   | Y  | Y  | Y  | Y  | Y  | Y  | Y  | Y  | Y  | Y   | Y   | Y   | Y   |     |
| msbA       | Y  | Y  | Y  | Y  | Y  | Y  | Y  | Y  | Y  | Y   | Y   | Y   | Y   | Y   | Y  | Y  | Y  | Y  | Y  | Y  | Y  | Y  | Y  | Y   | Y   | Y   | Y   |     |
| pmrF       | Y  | Y  | Y  | Y  | Y  | Y  | Y  | Y  | Y  | Y   | Y   | Y   | Y   | Y   | Y  | Y  | Y  | Y  | Y  | Y  | Y  | Y  | Y  | Y   | Y   | Y   | Y   |     |
| tolC       | Y  | Y  | Y  | Y  | Y  | Y  | Y  | Y  | Y  | Y   | Y   | Y   | Y   | Y   | Y  | Y  | Y  | Y  | Y  | Y  | Y  | Y  | Y  | Y   | Y   | Y   | Y   |     |
| ugd        | Y  | Y  | Y  | Y  | Y  | Y  | Y  | Y  | Y  | Y   | Y   | Y   | Y   | Y   | Y  | Y  | Y  | Y  | Y  | Y  | Y  | Y  | Y  | Y   | Y   | Y   | Y   |     |
| yojI       | Y  | Y  | Y  | Y  | Y  | Y  | Y  | Y  | Y  | Y   | Y   | Y   | Y   | Y   | Y  | Y  | Y  | Y  | Y  | Y  | Y  | Y  | Y  | Y   | Y   | Y   | Y   |     |
| AAC(3)-IId | .  | .  | .  | .  | .  | .  | .  | .  | .  | .   | .   | .   | .   | .   | .  | .  | .  | .  | .  | .  | .  | .  | .  | .   | .   | .   | Y   |     |
| armA       | .  | .  | .  | .  | .  | .  | .  | .  | .  | .   | .   | .   | .   | Y   | .  | .  | .  | .  | .  | .  | .  | .  | .  | .   | .   | .   | .   |     |
| ErmB       | .  | .  | .  | .  | .  | .  | .  | .  | .  | .   | .   | .   | .   | .   | .  | .  | .  | .  | .  | Y  | .  | .  | .  | .   | .   | .   | .   |     |
| mphE       | .  | .  | .  | .  | .  | .  | .  | .  | .  | .   | .   | .   | .   | Y   | .  | .  | .  | .  | .  | .  | .  | .  | .  | .   | .   | .   | .   |     |
| msrE       | .  | .  | .  | .  | .  | .  | .  | .  | .  | .   | .   | .   | .   | Y   | .  | .  | .  | .  | .  | .  | .  | .  | .  | .   | .   | .   | .   |     |



**Table S7.** The number of genes present exclusively in each strain and absent in the rest of isolates.

| Isolate | Exclusive genes |
|---------|-----------------|
| R1      | 119             |
| R2      | 41              |
| R3      | 18              |
| R4      | 8               |
| R5      | 0               |
| R6      | 43              |
| R7      | 1               |
| R8      | 7               |
| R9      | 39              |
| R10     | 5               |
| R11     | 57              |
| R12     | 11              |
| R13     | 2               |
| R14     | 80              |
| S1      | 13              |
| S2      | 0               |
| S3      | 41              |
| S4      | 43              |
| S5      | 12              |
| S6      | 27              |
| S7      | 49              |
| S8      | 4               |
| S9      | 5               |
| S10     | 0               |
| S11     | 0               |
| S12     | 112             |
| S13     | 13              |
| S14     | 67              |

**Figure S1.** Distribution of the homologous protein clusters identified in the 28 isolates, based on the number of genomes in which they are present. Core: 28 isolates; Soft Core:  $\geq 26$  isolates; Shell: 3 to 25 isolates; Cloud:  $\leq 2$  isolates.

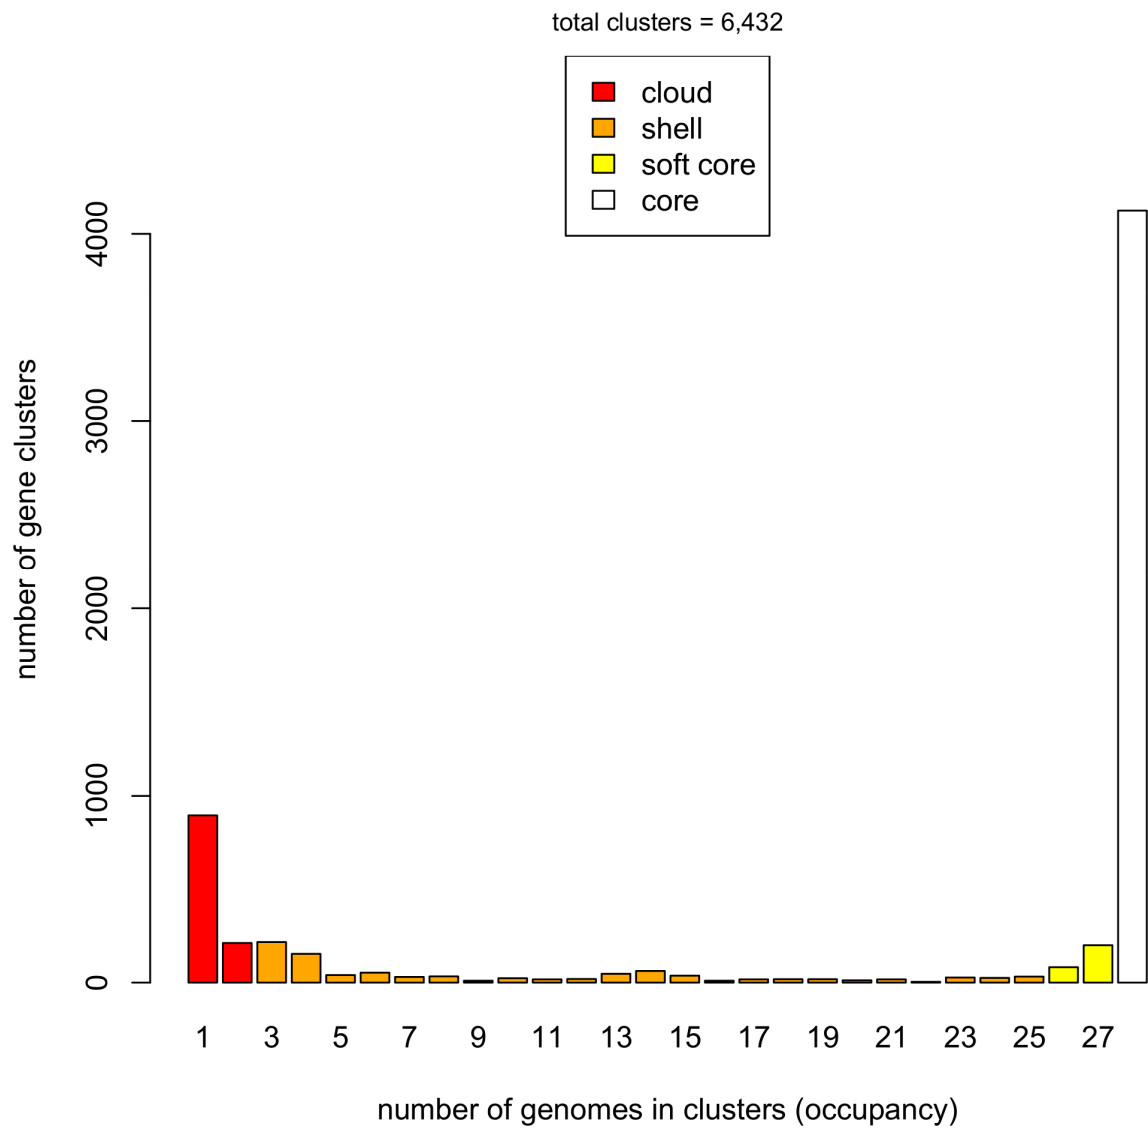

Supplement: s1 [file s1]
